# Supplementary material for: Exploratory Metabolomic Analyses Reveal Compounds Correlated with Lutein Concentration in Frontal Cortex, Hippocampus, and Occipital Cortex of Human Infant Brain
Source: PubMed Central journal article supplement (PMC4552625; doi:10.1371/journal.pone.0136904), 2015-08-28

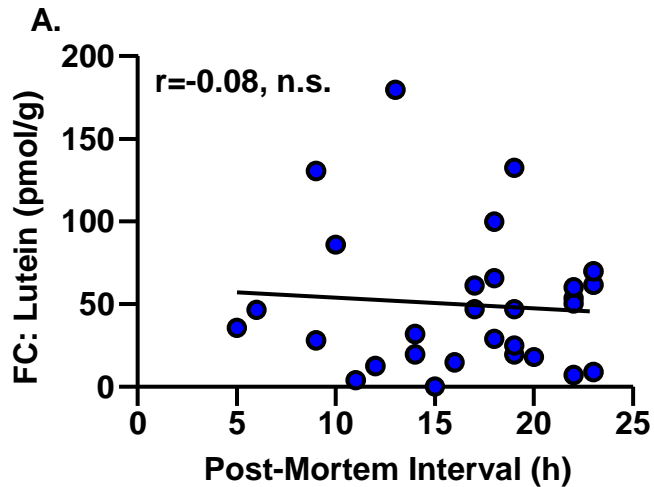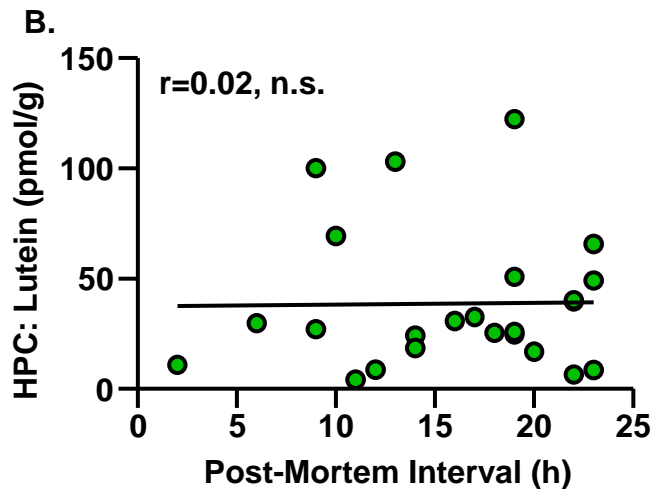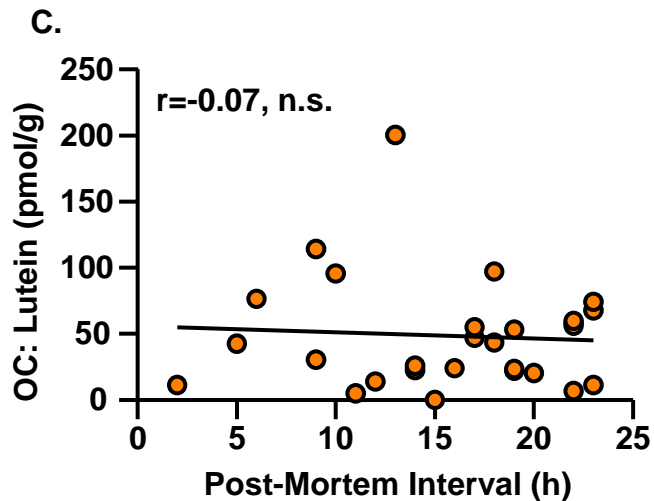

Supplement: pone.0136904.s004.pdf [file pone.0136904.s004.pdf]
